# Supplementary material for: 3D Printed Nanocellulose Scaffolds as a Cancer Cell Culture Model System
Source: MDPI journal article supplement (doi:10.3390/bioengineering8070097), 2021-07-10
Supplement: s1 [file s1]

**Table S1.** Primer sequences for qPCR.

|                         | Gene Name     | Forward Primer           | Reverse Primer          |
|-------------------------|---------------|--------------------------|-------------------------|
| Breast cancer stem cell | <i>CD44</i>   | GAAGAAGGTGTGGGCAGAAGA    | ACCATTTCTGAGACTTGCTG    |
| EMT                     | <i>TWIST1</i> | GGACAGTGATTCCCAGACGG     | CATAGTGATGCCTTTCCTTTCAG |
|                         | <i>SNAI1</i>  | TAATCCAGAGTTTACCTTCCAGCA | AGCCTTTCCTACTGTCCTCA    |
|                         | <i>MUC1</i>   | CTGGTCTGTGTTCTGGTTGC     | CCACTGCTGGGTTTGTGTAA    |
|                         | <i>VIM2</i>   | CAGATGCGTGAAATGGAAGA     | TGGAAGAGGCAGAGAAATCC    |
| Pluripotency            | <i>POU5F1</i> | CGAAAGAGAAAAGCGAACCAG    | AACCACACTCGGACCACATC    |
|                         | <i>SOX2</i>   | ACACCAATCCCATCCACACT     | CCTCCCCAGGTTTTCTCTGT    |
|                         | <i>NANOG</i>  | CCTATGCCTGTGATTTGTGG     | AAGTGGGTTGTTTGCTTTG     |
| Proliferation           | <i>MKI67</i>  | TGGGTCTGTTATTGATGAGCC    | CATCAGGGTCAGAAGAGAAGC   |
|                         | <i>CCNA2</i>  | AAGACGAGACGGGTTGC        | GGCTGTTTACTGTTTGCTTTC   |
|                         | <i>ERBB2</i>  | ACCTGGAACCTCACCTACCTG    | TCACTTGGTTGTGAGCGATG    |
| Differentiation         | <i>CDH1</i>   | AGAGGACCAGGACTTTGACTTG   | CAGAGAATCATAAGGCGGGG    |
|                         | <i>PGR</i>    | TAAATGAACAGCGGATGAAAGAA  | CGACACAACCTCTTTTGCCT    |
|                         | <i>EPCAM1</i> | CAGGAAGAATGTGTCTGTGAAAAC | TTCATTTCTGCCTTCATCACC   |
|                         | <i>CD24</i>   | GCTCCTACCCACGCAGATT      | GGTGGTGGCATTAGTTGGAT    |
| Reference genes         | <i>EIF1</i>   | TCGTATGTCCGCTATCCAGA     | TAAGGGTCTTCCTGCCGTTT    |
|                         | <i>YWHA2</i>  | ACGCCTCACTCCCGTTT        | CTGGATGTTCTGCTGGCTC     |
|                         | <i>GAPDH</i>  | AGTCAGCCGCATCTTCTTTT     | CGCCCAATACGACCAAAT      |
|                         | <i>RPS10</i>  | AGCCGCAGAGATGTTGATG      | CCTCGGGACTTGAGAGACTG    |
|                         | <i>RPS26</i>  | GATGCGTGCCCAAGGAC        | CAGGTCTAAATCGGGGTGG     |
